# Supplementary material for: Tailored plasmonic gold nanoparticles coated with manganese oxide for selective light-driven oxidation of 5-hydroxymethylfurfural
Source: Springer Nature journal article supplement (doi:10.1007/s42247-025-01277-4), 2025-10-01
Supplement: MOESM1 [file 42247_2025_1277_MOESM1_ESM.pdf]

Supporting Information. Tailored plasmonic gold nanoparticles coated with manganese oxide for selective light-driven oxidation of 5-hydroxymethylfurfural.

**Table S1** Volumes of 10 mM  $\text{KMnO}_4$  and  $\text{Na}_2\text{C}_2\text{O}_4$  solutions used for achieving different thicknesses of  $\text{MnO}_2$  over the Au nanoparticles (15 nm).

| Nominal $\text{MnO}_2$ overlayer (nm)                                 | 3.5   | 5.0   | 7.5   | 10.0  |
|-----------------------------------------------------------------------|-------|-------|-------|-------|
| Volume of 10.0 mM $\text{KMnO}_4$ ( $\mu\text{L}$ )                   | 164.5 | 270.0 | 523.1 | 855.0 |
| Volume of 10.0 mM $\text{Na}_2\text{C}_2\text{O}_4$ ( $\mu\text{L}$ ) | 32.9  | 50.0  | 101.6 | 171.0 |

**Table S2** Volumes required to obtain 1% weight loading in 50 mg of  $\text{ZrO}_2$ .

| $\text{Au@MnO}_2$ shell thickness (nm) | Volume (mL) | Mass Au (g) | Mass $\text{MnO}_2$ (g) | Total (g) |
|----------------------------------------|-------------|-------------|-------------------------|-----------|
| 10.0                                   | 1.055       | 0.252       | 0.248                   | 0.500     |
| 7.5                                    | 1.307       | 0.312       | 0.188                   | 0.500     |
| 5.0                                    | 1.597       | 0.382       | 0.118                   | 0.500     |
| 3.5                                    | 1.760       | 0.421       | 0.079                   | 0.500     |

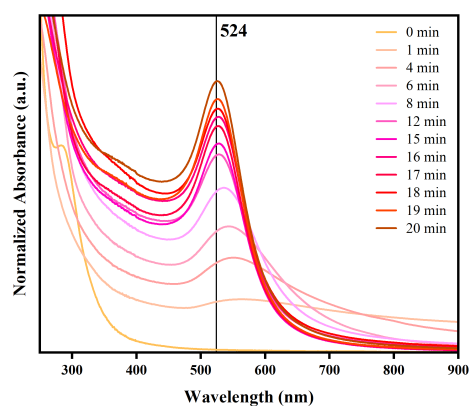

**Fig. S1** Time-dependent UV-Vis absorbance monitoring of gold nanoparticle formation following the addition of sodium citrate.

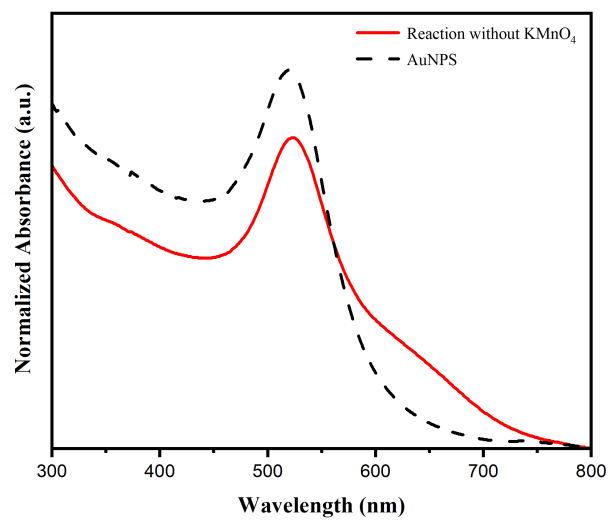

**Fig. S2** Control test without  $\text{KMnO}_4$ . The spectrum is normalized for the extinction at the top of the LSPR band.

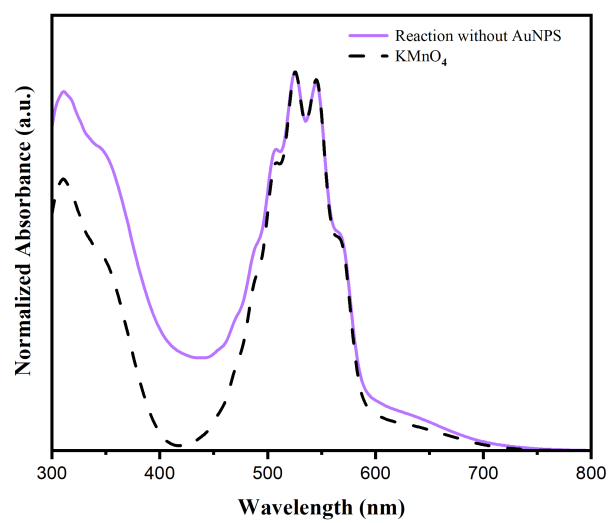

**Fig. S3** Control test without Au NPs. The spectrum is normalized for the extinction at the top of the LSPR band.

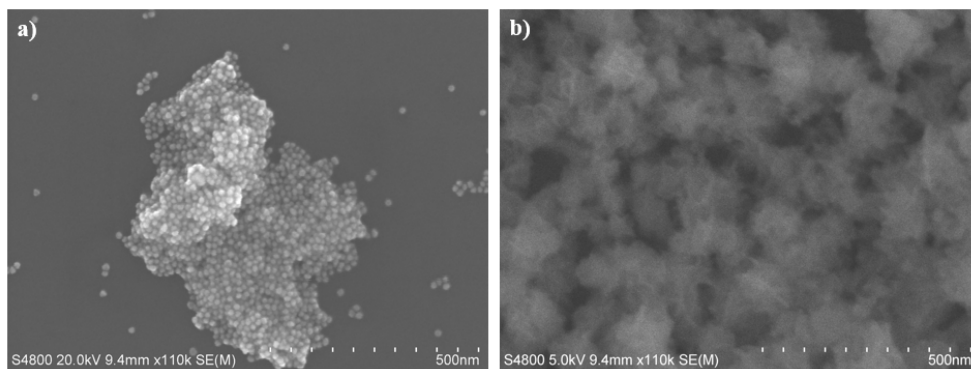

**Fig. S4** (a) SEM images from the control experiment without the use of  $\text{KMnO}_4$  (b) SEM images from the control experiment without the use of AuNPs.

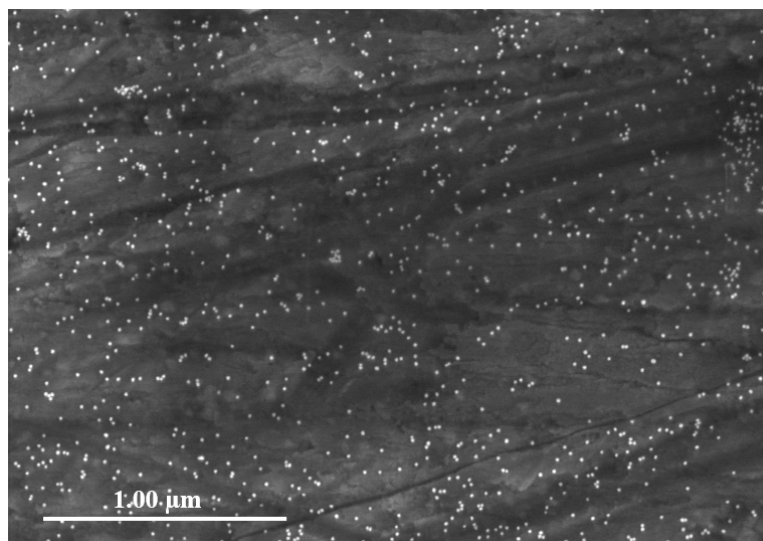

**Fig. S5** SEM images of AuSp NPs.

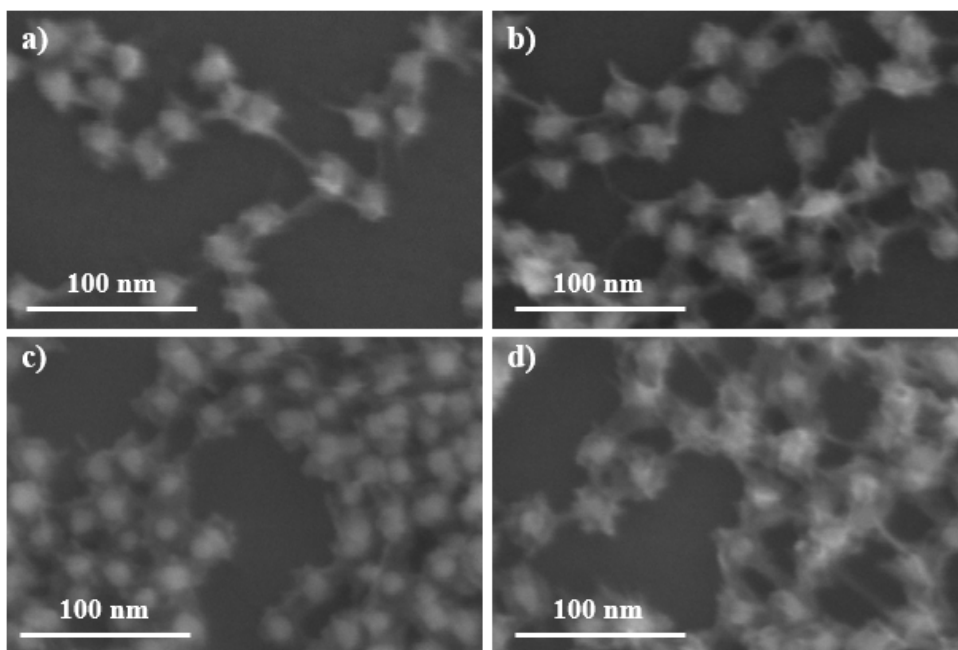

**Fig. S6** (a) SEM images of Au@MnO<sub>2</sub> with a 3.5 nm thick layer (b) SEM images of Au@MnO<sub>2</sub> with a 5 nm thick layer (c) SEM images of Au@MnO<sub>2</sub> with a 7.5 nm thick layer (d) SEM images of Au@MnO<sub>2</sub> with a 10 nm thick layer.

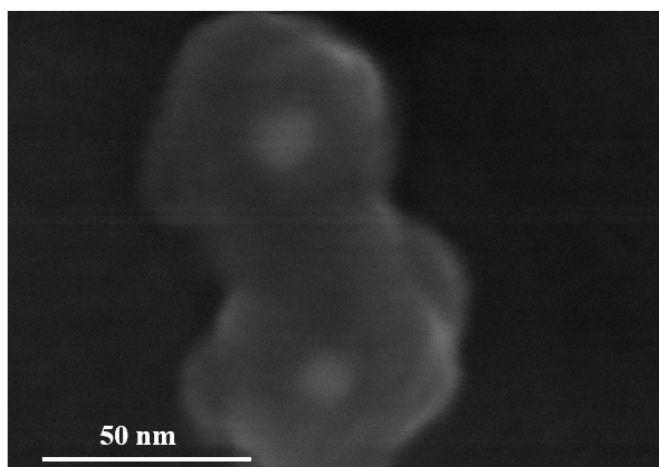

**Fig. S7** SEM images of Au@MnO<sub>2</sub> (10 nm) after one year in aqueous solution.

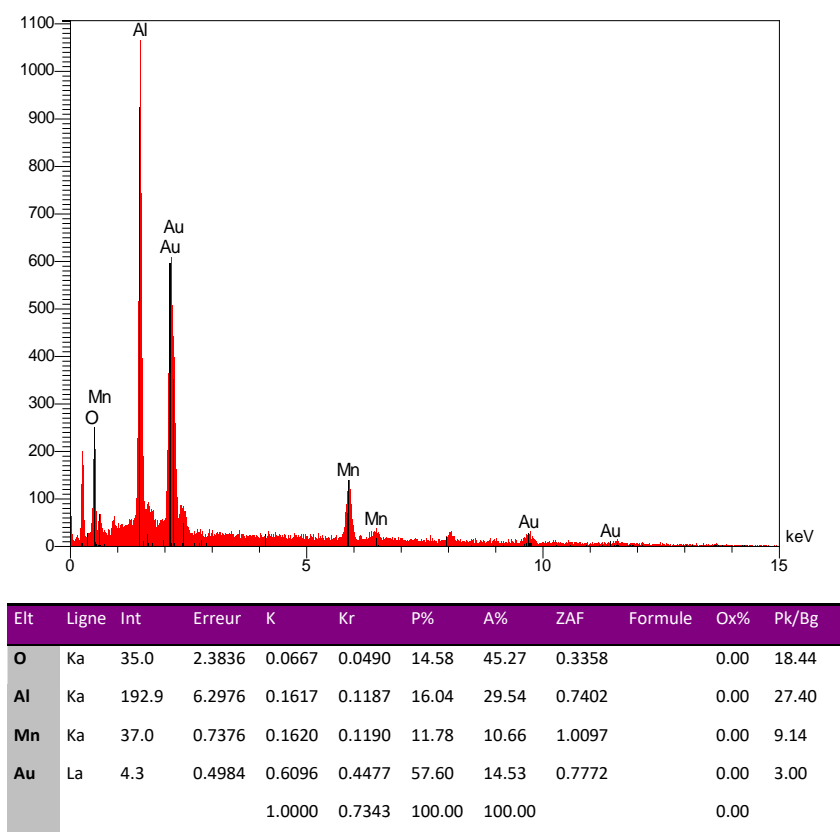

Fig. S8 Results of the EDX analysis showing the detected elements.

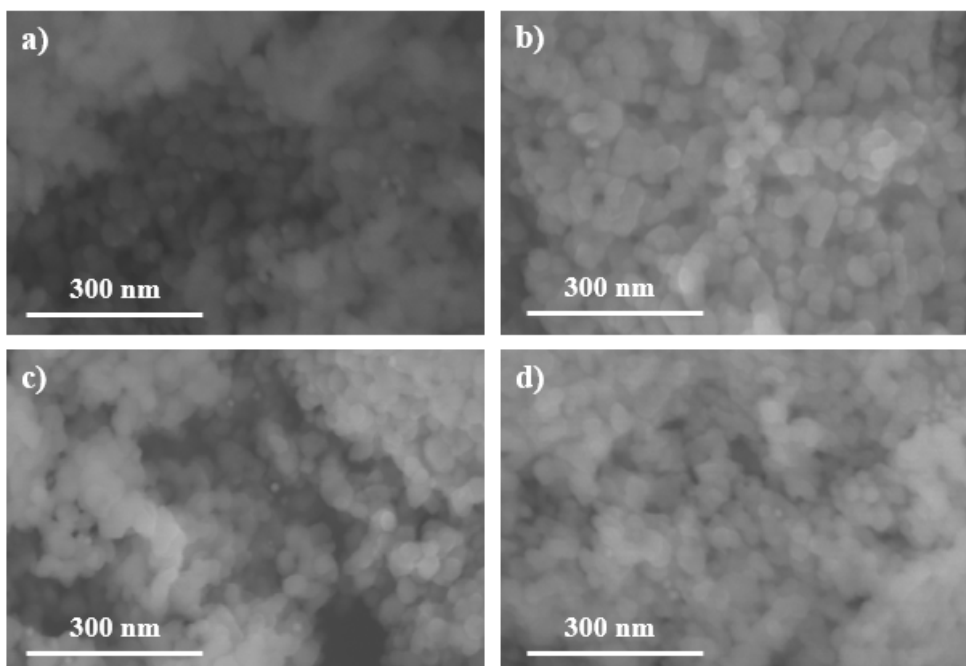

**Fig. S9** (a) SEM images of Au@MnO<sub>2</sub> with a 10 nm thick layer on ZrO<sub>2</sub> (b) SEM images of Au@MnO<sub>2</sub> with a 7.5 nm thick layer on ZrO<sub>2</sub> (c) SEM images of Au@MnO<sub>2</sub> with a 5 nm thick layer on ZrO<sub>2</sub> (d) SEM images of Au@MnO<sub>2</sub> with a 3.5 nm thick layer on ZrO<sub>2</sub>.

**Table S3** Comparison of Au/MnO<sub>2</sub> and Au@MnO<sub>2</sub> systems for the oxidation of HMF under various reaction conditions. HMF/Au represents the molar ratio, T the temperature, t the reaction time, C the conversion, S the selectivity, and r the product formation rate. The results for Au@MnO<sub>2</sub> were obtained under irradiation at 365 nm UV light.

| Catalyst                        | HMF/Au | Solvent | T (°C) | t (h) | C (%) | S <sub>HMFCA</sub> (%) | r <sub>HMFCA</sub> | S <sub>DFC</sub> (%) | r <sub>DFC</sub> | S <sub>FFCA</sub> (%) | r <sub>FFCA</sub> | S <sub>EDCA</sub> (%) | r <sub>EDCA</sub> | C.B. (%) | Ref       |
|---------------------------------|--------|---------|--------|-------|-------|------------------------|--------------------|----------------------|------------------|-----------------------|-------------------|-----------------------|-------------------|----------|-----------|
| Au/MnO <sub>2</sub>             | 20.82  | Water   | 100    | 12    | 75.7  | 1.40                   | 0.01               | -                    | -                | 0.10                  | 0.00              | 68.70                 | 0.29              | 70.2     | [1]       |
| Au/MnO <sub>2</sub>             | 9.33   | Water   | 100    | 12    | 99.0  | 3.20                   | 0.00               | -                    | -                | 0.40                  | 0.00              | 94.10                 | 0.01              | 97.7     | [1]       |
| Au/MnO <sub>2</sub> microsphere | 458.06 | DMF     | 120    | 8     | 82.0  | -                      | -                  | 99.00                | 10.20            | -                     | -                 | -                     | -                 | -        | [2]       |
| Au/MnO <sub>2</sub> blocky      | 458.06 | DMF     | 120    | 8     | 72.0  | -                      | -                  | 99.00                | 15.87            | -                     | -                 | -                     | -                 | -        | [2]       |
| Au/MnO <sub>2</sub> wire        | 458.06 | DMF     | 120    | 8     | 57.0  | -                      | -                  | 99.00                | 24.37            | -                     | -                 | -                     | -                 | -        | [2]       |
| Au/MnO <sub>2</sub> microsphere | -      | DMF     | 90     | 6     | 29.0  | -                      | -                  | -                    | -                | -                     | -                 | -                     | -                 | -        | [3]       |
| Au@MnO <sub>2</sub> 10 nm       | 657.34 | Water   | RT     | 4     | 38.5  | 4.85                   | 4.90               | 0.38                 | 0.38             | 3.92                  | 3.96              | 0.51                  | 0.52              | 65.2     |           |
| Au@MnO <sub>2</sub> 7.5 nm      | 516.04 | Water   | RT     | 4     | 39.6  | 4.73                   | 3.68               | 0.40                 | 0.31             | 4.72                  | 3.68              | 0.59                  | 0.46              | 64.5     | This work |
| Au@MnO <sub>2</sub> 5 nm        | 433.63 | Water   | RT     | 4     | 41.9  | 4.82                   | 3.04               | 0.63                 | 0.40             | 5.16                  | 3.25              | 0.74                  | 0.47              | 62.9     | This work |
| Au@MnO <sub>2</sub> 3.5 nm      | 393.46 | Water   | RT     | 4     | 42.5  | 4.47                   | 2.53               | 0.40                 | 0.23             | 4.35                  | 2.46              | 0.53                  | 0.30              | 61.7     | This work |

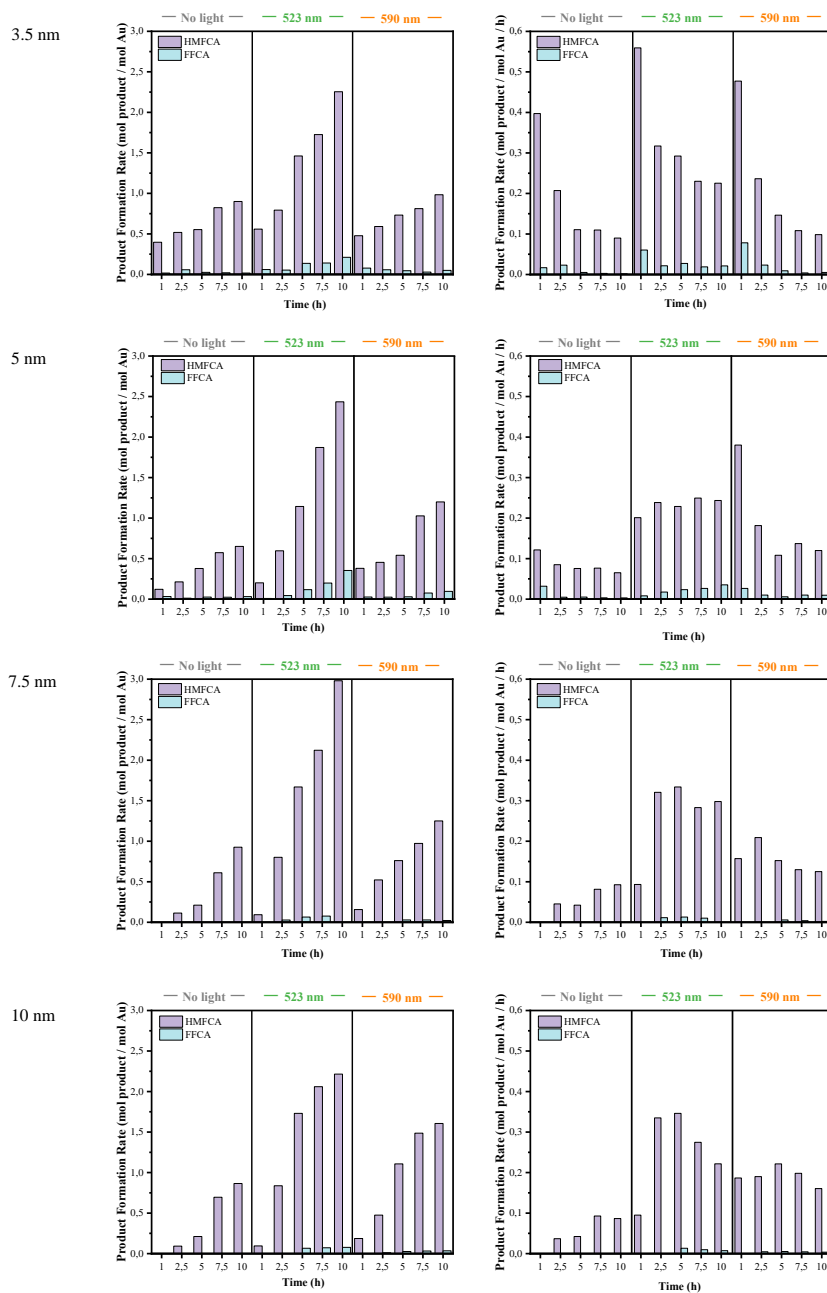

**Fig. S10** Evolution of the reaction over time under thermal (40°C, no light) and photochemical conditions (365 nm and 450 nm illumination) as a function of the catalyst used. Formation rates of HMFCa and FFCA during 10 h of reaction using 5 mg of catalyst with 25 mM HMF. The graphs on the right correspond to cumulative histograms, to be compared with the graphs on the left showing the hourly conversion of HMF into HMFCa and FFCA.

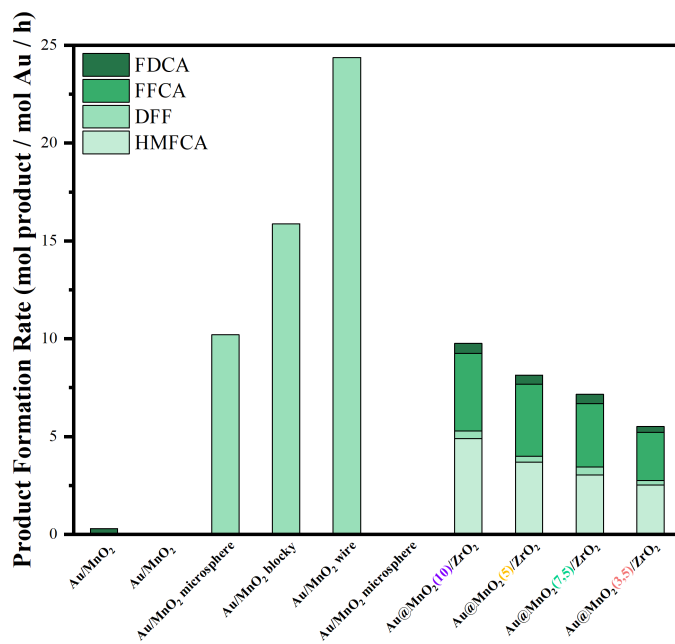

**Fig. S11** Comparison of Au/MnO<sub>2</sub> and Au@MnO<sub>2</sub> systems for the oxidation of HMF under various reaction conditions. The results for Au@MnO<sub>2</sub> were obtained under irradiation at 365 nm UV light.

## References

- [1] Zeng, D., Wang, W., Cui, B., Jiang, B., Zhang, C., Zhang, L., Wang, W.: Base-free selective oxidation of 5-hydroxymethylfurfural to 2,5-furandicarboxylic acid over au/mno<sub>2</sub> catalyst. *Fuel* **381**, 133238 (2025) <https://doi.org/10.1016/j.fuel.2024.133238>
- [2] Zhu, Y., Shen, M., Xia, Y., Lu, M.: Au/mno<sub>2</sub> nanostructured catalysts and their catalytic performance for the oxidation of 5-(hydroxymethyl)furfural. *Catalysis Communications* **64**, 37–43 (2015) <https://doi.org/10.1016/j.catcom.2015.01.031>
- [3] Zhu, Y., Lu, M.: Plant-mediated synthesis of au–pd alloy nanoparticles supported on mno<sub>2</sub> nanostructures and their application toward oxidation of 5-(hydroxymethyl)furfural. *RSC Advances* **5**(104), 85579–85585 (2015) <https://doi.org/10.1039/C5RA13157J>
